# Supplementary material for: Stack-dependent ion diffusion behavior in two-dimensional bilayer C3B
Source: Royal Society of Chemistry journal article supplement (doi:10.1039/d2dt03070e), 2022-01-01
Supplement: d2dt03070e1.pdf [file d2dt03070e1.pdf]

## Stack-dependent ion diffusion behavior in two-dimensional bilayer

### C<sub>3</sub>B

Gencai Guo<sup>1,3,4</sup>, Yan Peng<sup>1</sup>, Siwei Luo<sup>1\*</sup>, Gang Guo<sup>2\*</sup>, Chen Lai<sup>3</sup>, Manqi You<sup>1</sup>,  
Xiongxiang Xue<sup>1</sup>, Zongyu Huang<sup>1</sup>, Xiaolin Wei<sup>1</sup>, Ruzhi Wang<sup>3</sup>, Jianxin Zhong<sup>1</sup>

<sup>1</sup> Hunan Key Laboratory for Micro-Nano Energy Materials and Devices, Laboratory for Quantum Engineering and Micro-Nano Energy Technology, and School of Physics and Optoelectronics, Xiangtan University, Hunan 411105, China.

<sup>2</sup> School of Science, Hunan Institute of Technology, Hengyang 421002, China

<sup>3</sup> College of Materials Science and Engineering, Key Laboratory of Advanced Functional Materials, Education Ministry of China, Beijing University of Technology; Beijing 100124, China.

<sup>4</sup> Foshan Green Intelligent Manufacturing Research Institute of Xiangtan University, Guangdong 528311, China.

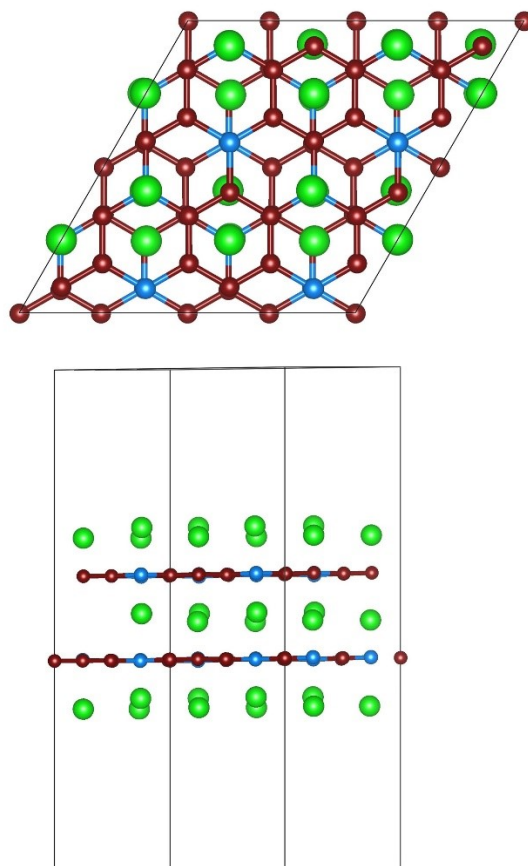

Figure S1. The optimized structure of Li<sub>1.5</sub>C<sub>3</sub>B.
